# Supplementary material for: Phase angle as a predictor of mortality in elderly patients with multimorbidity: a matched case-control study
Source: PeerJ. 2024 Nov 26;12:e18592. doi: 10.7717/peerj.18592 (PMC11606320; doi:10.7717/peerj.18592)
Supplement: Supplemental Information 1 [file peerj-12-18592-s001.xlsx]

## Sheet: Phase angle
Gender (1=male, 2=female)	Age (year)	total body water(L)	Intracellular water(L)	Extracellular water (L)	Fat mass(kg)	Fat free mass(kg)	Skeletal muscle mass(kg)	Body Mass Index (kg/m2)	ECW/TBW	Basal metabolic rate (kcal/(h·kg))	Visceral fat area (cm2)	Body cell mass (kg)	TBW/FFM (× 10-2L/kg)	Phase angle (°)	White blood cells (× 109/L)	neut%(%)	Red blood cells (× 1012/L)	Hemoglobin(g/L)	Total protein (g/L)	Albumin (g/L)	Prealbumin (mg/L)	Triglyceride (mmol/L)	Total cholesterol(mmol/L)	Urea nitrogen (mmol/L)	serum creatinine (mmol/L)	Death (1=death, 2=survival)
2	70	30.7	18.7	12	24.2	41.8	22.4	27.1	0.39	1273	127.9	26.8	73.5	4.7	5.91	2.01	3.41	133	79.3	52.5	351.7	2.85	4.86	4.7	42.1	2
2	92	24.8	14.5	10.3	24.5	33.5	17	24.5	0.413	1093	142.3	20.8	74	3.2	4.24	0.74	3.18	119	63.7	42	205.6	1.34	4.41	9	59.2	2
1	92	34.6	20.3	14.3	3.9	46.1	24.4	15.4	0.414	1365	27.5	29	75.1	2.7	6.55	2.04	3.09	111	61.4	31.9	144.3	0.88	3.44	8.3	73.3	2
2	88	25	14.9	10.1	27	34	17.4	25.1	0.405	1104	176.1	21.3	73.6	3.2	5.57	2.09	3.55	119	59.2	35.1	165.9	1.04	3.98	6.1	83	2
2	89	13.9	7.9	6	26.3	18.7	8.3	19.2	0.433	774	243.5	11.3	74.4	4	4.72	0.7	2.82	2.15	61.9	33.8	150.3	2.17	4.35	2.8	35.4	2
2	85	25.3	14.8	10.5	1	34	17.4	14.6	0.414	1103	32.6	21.3	74.6	1.9	10.33	0.84	1.77	49	49.6	23.4	28.6	1.44	2.66	5.8	62.9	1
2	83	26.2	15.5	10.7	19.8	35.2	18.2	22.6	0.411	1130	136.8	22.1	74.5	10.6	7.64	1.73	3.13	111	59.7	34.2	177.2	1.82	4.41	11.4	70	2
1	92	24.6	14.5	10.1	21.8	33.2	17	18.6	0.409	1088	150.6	20.8	74	2.9	7.1	0.8	4.43	136	67	38.7	146.9	0.88	4.27	4.3	53.4	2
1	74	28.5	16.4	12.1	7.1	37.9	19.4	13.9	0.423	1189	54.9	23.5	75	2.2	4.63	0.82	3.13	101	60.8	37.9	225.3	0.73	3.29	6.3	26.7	2
2	83	24.7	14.1	10.6	11.4	33.6	16.4	17.6	0.431	1096	86.2	20.2	73.5	1.4	6.21	1.53	2.96	82	53	30.1	116.9	2.88	2.61	5.6	217.1	1
1	80	38.6	24.4	14.2	10	52	29.9	22.2	0.367	1493	39	35	74.3	3.6	4.82	2.26	4.16	141	60.6	38.4	253.8	1.14	3.09	3.6	55.4	2
1	96	44.3	27	17.3	22.4	59.6	33.2	27.7	0.391	1657	89.5	38.7	74.4	3.1	4.6	1.33	4.47	131	64.1	35.1	173.3	0.85	3.99	7.5	87.1	1
2	70	29	17	12	10.6	39.4	20.1	19.1	0.415	1222	64.8	24.3	73.5	2.9	2.68	0.91	2.77	84	57.4	35.1	254.6	0.91	3.01	23.8	530.1	1
1	89	30.7	18.1	12.6	23.7	41.3	21.6	23.9	0.411	1261	140.3	25.9	74.5	3.3	6.15	2.71	4.53	140	64.8	36.8	165	2.32	4.4	4	58.3	2
1	70	42.5	25.7	16.8	22.2	57.8	31.5	24.2	0.395	1618	107.3	36.8	73.5	3.7	7.92	2.98	4.05	122	65.4	38.2	235.9	4	2.33	5.2	303	2
2	93	16.8	9.7	7.1	17.1	22.9	10.7	17.8	0.418	864	144.8	14	73.3	3.1	8.65	0.92	3.09	102	67.9	37.2	129.4	1.49	4.72	11.1	53.9	2
2	70	27.2	16.6	10.6	17	37	19.7	24	0.389	1168	76.2	23.8	73.6	4.8	10.63	0.91	3.91	127	61.3	37.2	211.1	1.34	4.41	4.3	70.1	2
2	86	25.9	14.8	11.1	9.9	35.1	17.2	18.7	0.429	1128	76.6	21.1	73.7	2.6	17.19	0.92	2.94	75	64.3	32.5	149.7	0.83	4.97	10.1	71	2
2	86	21.3	12.5	8.8	16	29	14.3	19.5	0.415	997	105.9	17.9	73.5	2.8	4.91	1.2	3.01	101	60.1	36.1	159.4	0.78	1.83	5.8	75.7	2
2	72	27.9	16.2	11.7	37.4	37.6	19.1	31.2	0.42	1182	229.2	23.2	74.2	2.7	8.28	2.23	3.43	104	62.5	32.4	168.9	2.96	4.12	4.5	42.9	2
1	83	29.3	17.3	12	25.3	39.7	20.5	23.9	0.411	1228	130.4	24.8	73.8	3.4	11.29	1.97	3.59	106	68.3	38.2	324.6	1.61	3.9	17.1	108.9	2
1	88	31.9	22.1	9.8	19.3	45.7	26.8	22.5	0.309	1357	9.9	31.6	69.9	4.4	9.06	1.61	3.35	112	65.2	41	234.2	0.75	3.71	6.9	61.5	2
1	91	22.9	12.7	10.2	30.1	29.9	14.6	22	0.447	1016	242.9	18.2	76.8	1.9	9.93	0.53	4.37	126	55.3	27.1	59.2	1.07	3.62	19.9	128.3	1
2	80	27.5	16.5	11	13	37	19.5	19.5	0.4	1169	83.8	23.6	74.3	2.1	4.9	0.79	4.14	127	68	34.5	188.7	1.15	4.15	7	42.5	2
1	92	28.4	16.4	12	24.7	38.3	19.4	23.1	0.422	1196	153.7	23.5	74.2	2.3	9.62	3.29	3.8	131	66.1	32.8	165.8	0.91	2.68	15	104.7	1
1	97	20.9	12.1	8.8	31.8	28.2	13.8	21.3	0.419	979	231.8	17.4	74.1	2.3	6.4	1.61	3.07	94	58.4	33.5	169.9	1.16	3.52	9.4	52.3	1
1	84	26.1	15	11.1	6.9	35.1	17.5	15.4	0.426	1129	53.8	21.5	74.3	2.2	13.86	3.31	3.16	104	59.9	34	152.3	1.09	3.38	4.7	57.2	2
2	94	27.1	16	11.1	19.3	36.7	18.8	23	0.411	1162	90.8	22.9	73.9	3.9	3.35	0.51	3.39	106	58	37.6	168.5	0.76	4.04	6.6	57.7	2
1	81	30.3	18	12.3	23.3	40.7	21.5	23.2	0.404	1249	118.7	25.8	74.4	4.1	5.67	1.89	3.74	120	68.9	41.1	396.4	2.05	4.86	9.4	68.2	2
1	75	29.2	16.9	12.3	26	39	20	22.5	0.422	1213	176.6	24.2	74.9	2.8	4.09	1.1	3.42	106	64.2	38.1	264.9	0.77	2.16	6.7	43.7	2
1	95	38.2	22.3	15.9	28.9	51.1	27	27.7	0.418	1474	163.5	31.9	74.8	3.1	6.47	1.06	3.46	110	56.1	33.8	155.4	1.14	2.87	10.3	150	2
2	88	27	15.8	11.2	43.6	36.4	18.6	32	0.416	1156	291.1	22.6	74.2	2.5	5.65	1.01	4.25	140	68	39.4	196.6	1.39	5.27	3.2	44	1
2	91	21.6	12.5	9.1	20.5	29.5	14.3	20.5	0.422	1008	151.5	17.9	73.3	2.4	7.32	0.87	2.28	73	64.4	38.5	189.2	1.76	3.73	12.7	47.2	1
2	84	18.3	10.3	8	25.6	24.4	11.5	20.8	0.437	897	200.8	14.8	75.2	2.9	8.04	1.7	2.72	88	62.7	37	386.5	1.2	3.41	13.5	87.6	2
2	84	24.1	14.4	9.7	18.1	31.9	16.7	19.5	0.405	1058	98.3	20.6	75.8	2.2	5.64	1.31	2.08	74	74.5	32.7	224.6	0.7	3.05	13.1	76.2	1
2	80	22.1	12.8	9.3	20	30	14.7	19.5	0.423	1017	149	18.3	73.8	3.3	3.95	1.09	3.51	108	65.6	36.2	242	1.56	6.17	11.8	46.9	1
1	80	31.9	19.4	12.5	16	43	23.3	23	0.391	1299	76.6	27.8	74.1	4.6	4.89	1.09	4.06	124	61.4	39.4	244	1.55	4.13	3.3	64.2	2
2	80	28.8	16.8	12	26.1	38.9	19.9	26.4	0.416	1210	166.3	24	73.9	3.1	10.07	1.79	3.8	116	64.3	40.7	299.2	3.38	4.08	6.3	60.6	2
2	88	24.3	14.4	9.9	22	33	16.8	24.4	0.407	1082	137.6	20.6	73.7	3.1	6.49	1.9	3.49	116	57.6	36	193.3	1.02	2.93	8.3	73.7	2
1	70	41.4	24.7	16.7	20	56	30.2	25.7	0.404	1579	113.3	35.4	74	4.3	8.39	2.97	4.45	136	75.3	44.9	239.1	2.76	2.93	6.5	68.8	1
2	87	21.6	13.2	8.4	19.4	29.6	15.2	22.4	0.391	1009	117.2	18.8	72.9	4.5	5.4	1.02	3.23	100	63.7	43.2	179.9	1.31	4.17	3.7	53.5	2
1	70	36.9	21.5	15.4	25.4	49.6	26.1	26.3	0.417	1442	140.4	30.9	74.4	3.4	5.76	1.71	4.19	129	64.1	41.8	256.7	2.18	3.39	3.4	52.7	1
1	70	39.4	22.9	16.5	37	53	27.8	28.4	0.42	1515	238	32.7	74.4	1.8	6.35	1.65	4.44	136	76.8	40.9	312.5	1.49	3.87	10.7	78.7	1
1	99	40.1	24.2	15.9	1.7	53.3	29.6	16.8	0.396	1522	14.4	34.7	75.1	4.7	9.28	1.03	3.43	109	65.5	24.4	145.7	0.78	3.01	7.9	110.5	1
2	79	29.2	17.2	12	23.5	39.5	20.5	24.6	0.41	1224	122.3	24.7	73.8	3.7	5.4	1.02	3.23	100	63.7	43.2	179.9	1.31	4.17	3.7	53.5	2
2	83	19.7	11.6	8.1	28.1	26.9	13.2	22.9	0.41	951	214.6	16.7	73.3	2.9	7.52	1.28	2.42	80	55.9	31.4	191.2	4.96	3.2	2	41.7	2
2	96	21.3	12.2	9.1	21.1	28.9	14	20.8	0.424	993	168.3	17.5	73.7	1.8	7.35	0.59	2.42	75	52.1	31.9	283.3	2.57	3.81	13.7	95.9	1
2	80	33.4	20.1	13.3	26.6	45.4	24.2	30	0.398	1350	112.4	28.8	73.5	4.3	6.95	2.96	4.1	133	67.1	40.7	185.5	1.06	3.25	5.7	42.4	2
1	85	50.6	30.7	19.9	23.2	68.8	38	29	0.394	1855	90.3	43.9	73.6	4.8	5.95	2.16	4.56	140	70.9	43.1	256	1.03	4.18	7.2	85.1	2
1	90	33.4	19.6	13.8	15.2	44.8	23.6	20	0.413	1337	84.4	28.1	74.6	3.8	12.17	1.65	3.02	92	56.2	29.9	90	1.18	4.96	6.5	100.2	2
1	87	25.5	15.3	10.2	13.4	34.6	17.9	19	0.4	1117	63.7	21.9	73.6	4.3	4.99	0.79	3.78	114	60	36.1	159.8	0.67	2.68	19.7	219.3	2
1	97	38.8	22.5	16.3	27.7	52.3	27.3	29.4	0.42	1499	112.9	32.2	74.2	2	7.84	1.48	4.59	135	55.8	33.4	126.9	0.97	2.81	9.9	76.7	1
1	84	26.5	15.5	11	22.4	35.6	18.2	20.1	0.413	1138	148.2	22.2	74.4	3.1	6.29	1.24	4.84	132	60.7	32.8	83.5	0.97	3.34	1.4	38	2
2	70	26.3	16.1	10.2	20.1	35.9	19	22.4	0.387	1145	98.7	23.1	73.2	4.9	5.59	1.8	4.64	146	73.8	48.1	242.4	1.08	3.36	2.9	45.8	2
2	80	26.9	16	10.9	24.7	36.3	18.9	25.7	0.404	1153	119.1	23	74.1	4.5	6.79	1.71	3.74	119	62	42.1	192.5	1.02	3.77	8	77.6	2
2	70	32.7	20	12.7	17.4	44.6	24.1	24.2	0.388	1334	64.8	28.6	73.2	4.9	7.92	2.49	3.65	111	67.2	37.5	156	1.24	4.07	3.3	77.3	2
2	84	21.7	12.8	8.9	18.5	29.5	14.7	19.2	0.411	1008	113.4	18.3	73.6	2.7	8.24	1.88	4.04	119	63.1	37.6	226.4	1.18	4.17	12	66.6	2
1	74	44.6	27	17.6	30.7	60.3	33.2	31.5	0.394	1672	132.7	38.7	74	5.5	7.73	1.5	4.44	144	68.4	41.7	180.6	1.83	2.55	4.8	53.4	2
2	70	33.8	20.8	13	29	46	25.1	29.3	0.384	1363	131.2	29.8	73.5	5.6	5.44	1.3	4.05	126	62.2	39.1	192.2	1.9	4.32	2.9	64.5	2
1	85	29.2	17.3	11.9	20.5	39.5	20.6	22	0.406	1224	112.6	24.8	73.8	3.6	7.78	1.42	5.77	159	69.6	42.3	239.7	1.62	5.71	4.2	75	2
2	69	29.5	17.8	11.7	45.1	39.9	21.3	34.9	0.396	1232	242.4	25.5	73.9	5.2	6.11	1.19	4.38	141	64.8	39.3	206.6	1.14	2.5	3.9	46.3	2
1	89	29.1	18.4	10.7	15.9	39.1	22	22	0.367	1216	46.4	26.4	74.3	0.9	10.08	1.34	3.94	117	58.8	32.8	155.4	1.02	3.63	27.4	159.6	1
2	85	23.6	14.2	9.4	8	32	16.5	16	0.399	1062	40.1	20.3	73.6	3	5.97	1.74	4.27	122	65.1	39.9	144	1.06	4.59	4.8	45.9	2
1	70	37.4	22.8	14.6	1.6	50.4	27.7	19.8	0.391	1460	11.5	32.6	74.1	5.9	7.54	0.94	4.05	129	53.1	28	82.6	1.63	3.38	5.1	53.8	2
1	91	30.9	18.3	12.6	23.3	41.7	21.9	23.9	0.406	1270	120.1	26.3	74.1	4.1	17.05	1.06	4	124	55	30.7	110.8	0.82	3.64	5.8	57.8	2
2	90	25.6	15.1	10.5	25.3	34.7	17.7	25.6	0.412	1120	151.6	21.6	73.8	2.9	7.88	2.36	2.79	91	66.2	40.3	138.1	1.65	5.7	3.7	46.1	2
1	76	26.4	15.2	11.2	9.4	35.6	17.8	16.5	0.426	1139	67.4	21.7	74.1	2.1	6.31	1.08	2.85	89	56.9	34.5	114.7	2.27	2.24	2.2	28.4	2
1	89	45.5	26.6	18.9	22.8	61.2	32.6	28.1	0.416	1691	101.6	38	74.4	3.8	6.57	1.1	2.71	82	65.7	42.3	172.7	6.2	92.4	9.8	134.2	1
2	70	38.1	23.5	14.6	22.2	51.8	28.6	28.2	0.384	1488	81.3	33.6	73.5	5.9	6.63	1.07	3.86	127	65.3	43.1	293.2	1.6	4.46	7.9	51.7	2
2	84	22.6	13.2	9.4	9.3	30.7	15.2	17.8	0.415	1034	59.7	18.9	73.6	3.9	3.51	1.13	2.94	92	43.9	25.9	221.1	0.69	4.38	8.5	51.4	2
2	70	27.9	16.6	11.3	42.4	37.6	19.7	32.9	0.404	1182	231.8	23.8	74.1	4.1	6.11	1.19	4.38	141	64.8	39.3	206.6	1.14	2.5	3.9	46.3	2
1	83	32.5	19.1	13.4	33.2	43.8	22.9	28.3	0.413	1317	189.9	27.3	74.2	3.5	5.09	1.29	3.44	106	57.8	33.9	142.4	1.08	3.46	5.4	60.5	2
2	81	36.2	23.5	12.7	1.5	48.5	28.7	19.5	0.351	1418	5	33.7	74.7	6.7	5.09	0.73	3.39	96	53.3	27.3	29.3	#NULL!	#NULL!	2.1	30.6	2
2	70	25	15	10	13.1	33.9	17.6	18.8	0.399	1103	62.8	21.5	73.7	4.2	4.04	0.85	4.03	126	64.8	42.1	166.4	1.12	5.74	4.4	49.4	2
1	70	41.2	25.1	16.1	14.2	55.8	30.7	22.1	0.39	1576	66.4	36	73.8	5.1	5.56	1.12	4.8	131	71.2	49.8	235.4	0.98	2.38	9.1	81.4	2
2	98	16.7	9.6	7.1	12.4	22.6	10.5	15.6	0.424	859	96.3	13.8	73.7	2.7	5.66	1.56	3.37	84	58.4	31.7	92.4	1.52	4.07	14	170.9	2
2	80	31.7	19	12.7	19.1	42.9	22.7	21.5	0.401	1296	89	27.2	73.8	4	6.24	2.03	2.88	92	59	35.1	93.8	1.34	5.78	5.8	61.3	2
1	78	40.3	23.4	16.9	10.6	54.4	28.5	23	0.419	1544	50.8	33.5	74	4	10.64	0.58	2.79	69	64.1	33.6	15.9	1.37	3.56	15.9	144.5	2
1	84	39	23	16	27.8	52.2	27.9	27.7	0.411	1497	159	32.9	74.7	6	5.25	0.62	6.87	203	59.5	38.9	256.4	1.39	4.24	8.2	57	2
2	71	31.2	17.5	13.7	1.3	41.7	20.8	17.2	0.439	1271	44.2	25.1	74.9	1.4	5.29	0.66	3.61	123	49.6	30	99.6	1.25	3.69	19.4	91.8	1
2	89	33	19	14	15.8	44.2	22.8	25	0.422	1325	84.9	27.3	74.5	2.5	7.41	1.05	2.52	78	54.3	31.6	95	1.74	2.9	3.7	42.6	2
1	73	31.3	19.2	12.1	12.5	42.5	23	20.2	0.387	1287	49.4	27.5	73.7	4.2	6.02	1.21	3.91	117	63.9	37.9	164	0.99	4.27	4.6	46.4	2
2	83	30.9	17.9	13	28.6	41.4	21.4	29.1	0.42	1264	171.4	25.7	74.7	3.2	16.28	1.24	3.87	118	54.4	30.5	38.6	1	4.7	2.3	35.4	2
1	91	31.9	19.6	12.3	26.4	43.6	23.6	24.2	0.385	1311	129.3	28.1	73.3	5.2	8.62	1.38	4.2	135	63.4	33.2	83.5	0.72	3.36	3.3	85.9	2
2	72	30.8	18.8	12	24.9	42.1	22.5	27.9	0.39	1280	89	26.9	73.2	5.5	5.54	1.62	4.43	134	61.9	40.9	223.8	0.78	4.09	4.2	35.2	2
2	82	34.5	20.6	13.9	27.2	46.8	24.8	27.9	0.404	1380	107.2	29.5	73.8	4.6	5.85	1.3	4.43	131	65.7	40.5	173.1	2.4	5.13	5.3	62.2	2
2	88	25.8	15.2	10.6	19.9	35.1	17.9	22	0.409	1127	98.5	21.8	73.5	2.9	6.66	1.49	3.55	99	55.6	31.7	85.3	1.28	4.49	3.2	40.2	2
2	90	23.8	14.2	9.6	22.7	32.3	16.6	22.9	0.401	1068	135.3	20.4	73.5	4.2	9.09	1.43	3.67	111	64.6	41.3	144.3	1.07	4.97	8.4	80.1	2
1	88	10.2	4.6	5.6	32	13	4.1	17.6	0.545	650	377.8	6.7	78.6	0.5	8.23	1.37	3.32	111	55.8	30.6	215.7	1.4	3.87	8.3	76.6	1
2	82	25.7	15	10.7	10.4	34.6	17.6	18.7	0.416	1117	64.1	21.5	74.3	5.8	5.02	1.05	2.3	79	50.8	31	120.3	#NULL!	#NULL!	9.5	42.4	2
2	75	28.5	16.7	11.8	23.2	38.8	19.8	25.8	0.413	1207	113.7	24	73.7	3.5	4.23	1.34	3.88	106	60.2	37	154.9	0.79	3.23	8.4	93.6	2
1	80	31.8	19.3	12.5	15.9	43.1	23.2	23	0.394	1301	61.7	27.6	73.8	4.9	4.26	1.38	4.27	127	62.9	39.4	209.9	0.99	3.83	4	53.7	2
1	80	35.8	20.7	15.1	21.7	48.3	25.1	25.7	0.42	1414	115	29.7	74.1	2.9	7	0.32	4.05	114	54.1	32.9	99	0.69	2.87	29.5	752.6	1
2	91	24.4	14.5	9.9	29.1	32.9	16.9	27.6	0.405	1081	174.1	20.8	74	4	5.87	0.36	3.82	118	68.4	39.4	264.2	1.7	5.14	15.2	166.8	2
2	84	32.2	18.1	14.1	27.4	42.6	21.6	28	0.437	1289	90.7	26	75.7	3.1	7.17	0.74	2.85	94	43.1	23	28.4	0.93	2.74	8	80.2	2
1	76	33.4	19.7	13.7	34.9	45.1	23.7	28.3	0.411	1344	180.4	28.2	74.1	3.5	8.42	0.77	4.15	132	56.9	32.4	84.5	1.13	2.83	4.5	70.2	2
1	81	37.2	21.8	15.4	14.8	50.2	26.4	20.5	0.414	1454	78.2	31.2	74.1	3.4	15.41	0.65	3.95	121	62	35.6	126.4	0.63	3.49	6.8	70	2
1	80	38.4	22.6	15.8	18.4	51.6	27.5	22.9	0.41	1484	91.4	32.4	74.5	4.3	6.97	1.25	4.31	136	64.1	37.9	128.4	1.18	5.02	5.5	90.1	2
1	83	34.6	20.6	14	2.4	46.6	24.9	16.4	0.404	1377	19.6	29.5	74.2	4.5	5.7	1.17	4.16	131	67.2	33.7	75.9	0.81	3.55	4.6	58.2	2
1	70	39.4	23.6	15.8	15.9	53.1	28.7	25.3	0.402	1517	65.5	33.7	74.2	4.7	5.06	0.98	4.04	92	74	38.8	184.4	1.32	3.76	5.1	72.6	2
2	70	38	23.4	14.6	30.8	51.2	28.5	32	0.385	1476	160.4	33.5	74.2	5.8	8.36	1.6	3.14	95	66.8	38.5	213.8	1.39	4.07	6.9	100.4	2
2	92	24.1	13.9	10.2	32.2	32.8	16.2	26	0.423	1079	202.9	19.9	73.5	2.4	7.86	0.88	3.83	115	56.3	35	82.8	1.82	2.58	5.3	30.4	1
2	79	31.3	18	13.3	10.2	41.8	21.5	18	0.425	1273	73.1	25.8	75	2.9	4.93	0.71	3.27	110	75.5	45	366.4	1.02	4.26	5.9	26.6	2
2	87	40.5	22.8	17.7	21.4	54.1	27.7	27.7	0.437	1539	102.7	32.7	74.9	2.4	7.57	0.93	4.72	103	63.1	35.8	15.5	0.87	4	11.5	89.9	1
2	87	20.2	11.4	8.8	2.6	27.4	12.9	11.7	0.435	962	45.1	16.3	73.6	1.9	18.95	2.35	3	88	66.8	32.6	214	2.56	4.47	17.5	61.5	1
1	77	42.1	25	17.1	13	57	30.6	24.2	0.406	1601	66.9	35.8	73.9	3.6	11.69	1.94	3.25	103	65.4	39.1	224.4	1.25	4.49	12	175	2
2	91	24.7	14.5	10.2	11.4	33.6	17	20	0.411	1097	70	20.8	73.4	3.2	7.65	2.2	3.42	107	63.4	39.7	231.6	2.57	4.36	4.2	64.7	2
2	70	26.3	16.1	10.2	20.2	35.8	19	21.9	0.389	1144	113.4	23	73.5	4.8	4.54	1.24	4.18	134	66.3	43.3	304.6	1.4	3.81	1.8	47.5	2
2	90	23.2	16.4	6.8	21.9	33.1	19.4	22.9	0.294	1084	38.9	23.5	70.2	5.2	11.4	0.39	3.42	104	55.7	36.2	109.6	1.12	3.44	20.7	126	2
2	80	26	15.3	10.7	22.6	35.4	18	23.8	0.41	1134	140.3	22	73.5	3.5	6.99	1.7	3.34	96	59.1	35.4	217.1	#NULL!	#NULL!	13.2	90.5	2
2	81	23.9	14.4	9.5	32.7	32.3	16.8	28.9	0.398	1067	181.8	20.6	74.1	4.9	5.93	1.37	2.77	77	74.8	43.2	242.4	0.72	3.21	18.6	159.9	2
1	76	34.1	20.9	13.2	14.7	46.3	25.3	21.4	0.386	1370	66.2	30	73.6	5.2	4.75	1.19	4.51	140	59.2	40.1	244.6	16.95	7.82	6.1	72.1	2
1	92	32.5	19	13.5	16.2	43.8	22.8	19.6	0.417	1317	101.4	27.2	74.2	2.3	6.5	0.31	4.1	128	57.2	33.9	94.6	0.34	2.84	23.7	238.3	1
1	76	23.4	14.6	8.8	23.2	31.8	17.1	19.5	0.376	1057	136.3	20.9	73.7	3	10.38	1.22	3.32	100	70.5	31.7	69.8	0.75	3.99	7.6	45.6	2
2	87	27	15.5	11.5	18.2	36.8	18.2	22.9	0.426	1166	120.2	22.2	73.2	2.3	7.48	1.13	2.95	87	68.8	40.9	83	1.06	3.7	9	86.8	1
2	87	17.9	10.2	7.7	0.7	24.3	11.4	9.8	0.428	894	45.3	14.7	73.8	2	18.95	2.35	3	88	66.8	32.8	214	2.56	4.47	17.5	61.5	1
2	84	22.8	13.4	9.4	34.1	30.9	15.4	27.1	0.415	1037	241	19.1	73.9	3.5	6.75	1.47	2.55	81	66.2	37.2	295.3	6.22	3.67	2.9	40.8	2
2	96	27	15.5	11.5	28.8	36.2	18.2	26	0.426	1153	192.9	22.2	74.4	2.8	4.81	1.06	3.55	113	67.8	36.8	264.3	0.85	4.84	9.5	64.9	2
1	87	42.5	25.1	17.4	13	57	30.7	22.9	0.41	1602	76.3	35.9	74.5	2	8.5	1.07	3.88	105	45.8	25	7	#NULL!	#NULL!	5	57.2	1
2	88	23.3	13.2	10.1	8.3	31.7	15.2	15.6	0.432	1056	71.6	18.9	73.2	1.2	10.18	0.92	4.73	131	46.9	27	120.3	#NULL!	#NULL!	14.1	65.3	1
1	76	41.4	25.2	16.2	14.7	55.3	30.8	22.1	0.392	1565	83.3	36	74.8	12.7	6.92	1.6	3.39	110	59.1	35.7	200.4	0.81	2.94	7.3	32.6	2
